# Supplementary material
Source: MDPI journal article supplement (https://www.mdpi.com/2076-0760/11/12/577)
Supplement: s1 [file s1]

<Supplemental materials>

## Disparities in COVID-19 Impacts on Work Hours and Career Satisfaction by Gender and Race among Scientists in the US: An Online Survey Study

Seulkee Heo <sup>1,\*</sup>, Pedro Diaz Peralta <sup>1,2</sup>, Lan Jin <sup>3</sup>, Claudia Ribeiro Pereira Nunes <sup>1,4</sup> and Michelle L. Bell <sup>1</sup>

<sup>1</sup> School of the Environment, Yale University, New Haven, CT 06511, USA

<sup>2</sup> Administrative Law Department, School of Law, Universidad Complutense de Madrid, 28005 Madrid, Spain

<sup>3</sup> School of Public Health, Yale University, New Haven, CT 06510, USA

<sup>4</sup> Graduate Program in Law, School of Law, Federal University of Amazon, Manaus, Amazonas 69020-160, Brazil

\* Correspondence: seulkee.heo@yale.edu

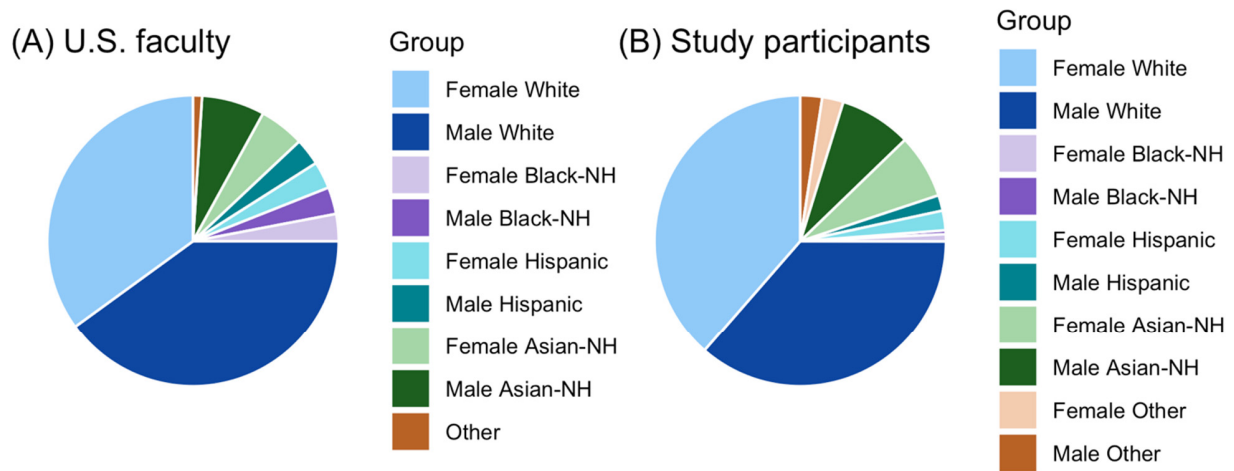

Supplemental Figure S1. Distribution by race/ethnicity and gender for (A) U.S. faculty at degree-granting postsecondary institutions (Hussar et al. 2020) and (B) study participants.

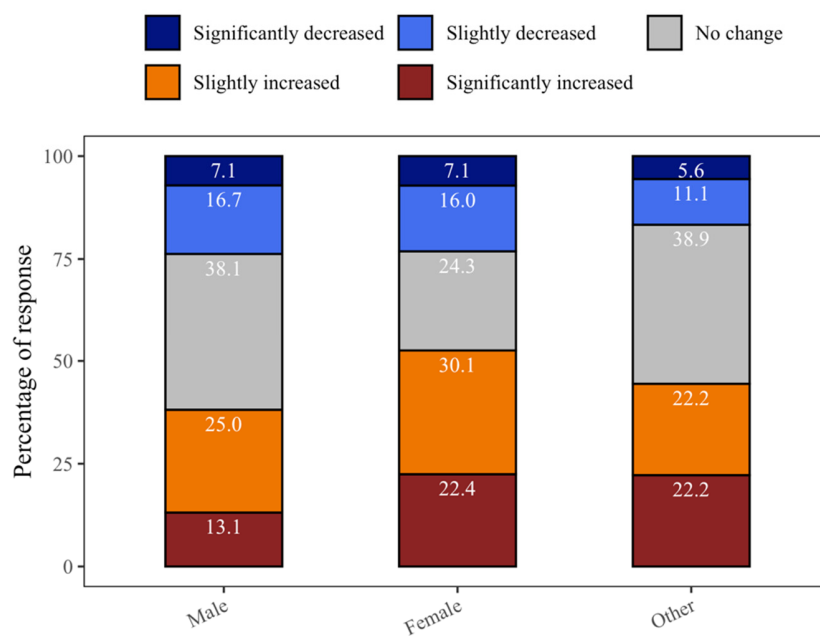

Supplemental Figure S2. Changes in the number of work hours during the pandemic compared to pre-pandemic periods by gender.

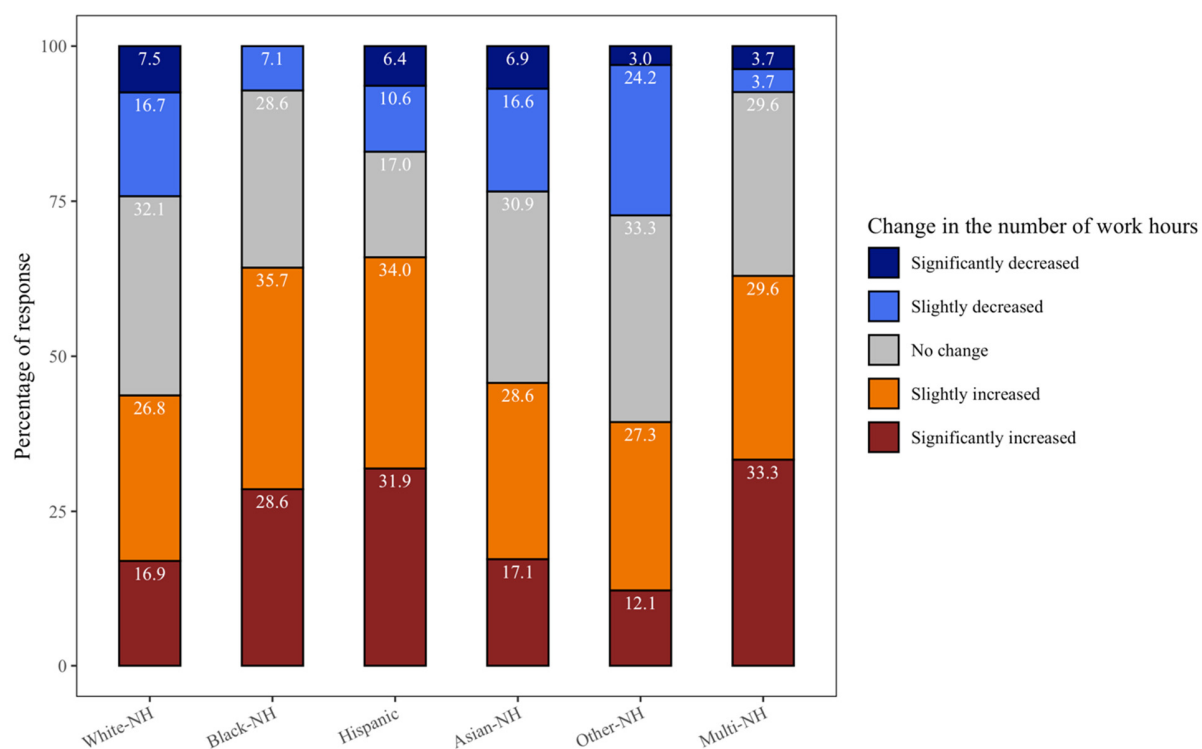

Supplemental Figure S3. Changes in the number of work hours during the pandemic compared to pre-pandemic periods by race and ethnicity.

## References

Hussar, Bill, Jijun Zhang, Sarah Hein, Ke Wang, Ashley Roberts, Jiashan Cui, Mary Smith, Farrah Bullock Mann, Amy Barmer, and Rita Dilig. 2020. *"The Condition of Education 2020 (NCES 2020-144)." Washington, DC: National Center for Education Statistics: U.S. Department of Education.*  
<https://nces.ed.gov/pubsearch/pubsinfo.asp?pubid=2020144>.
